# Supplementary material for: Immune Modulatory Effects of Probiotic Streptococcus thermophilus on Human Monocytes
Source: MDPI journal article supplement (doi:10.3390/biologics1030023), 2021-11-19
Supplement: s1 [file s1]

**Table S1.** Full name Universal name, symbol and full name the genes and the house keeping gens (HKG) included in RT<sup>2</sup> gene profiler arrays used to determine gene/RNA expression of monocytes post co-culturing with ST285 with monocytes.

| Posit ion | Uni gene  | Symbol | Description                                                                       | GENE name                                                                             |
|-----------|-----------|--------|-----------------------------------------------------------------------------------|---------------------------------------------------------------------------------------|
| A01       | Hs.507080 | APCS   | Amyloid P component, serum                                                        | HEL-S-92n/PTX2/SAP                                                                    |
| A02       | Hs.529053 | C3     | Complement component 3                                                            | AHUS5/ARMD9/ASP/C3a/C3b/CPAMD1/HEL-S-62p                                              |
| A03       | Hs.2490   | CASP1  | Caspase 1, apoptosis-related cysteine peptidase (interleukin 1, beta, convertase) | ICE/IL1BC/P45                                                                         |
| A04       | Hs.303649 | CCL2   | Chemokine (C-C motif) ligand 2                                                    | GDCF-2/Hc11/HSMCR30/MCAF/MCP-1/MCP1/SCYA2/SMC-CF                                      |
| A05       | Hs.514821 | CCL5   | Chemokine (C-C motif) ligand 5                                                    | D17S136E/RANTES/SCYA5/SIS-delta/SISd/TCP228/eoCP                                      |
| A06       | Hs.184926 | CCR4   | Chemokine (C-C motif) receptor 4                                                  | CC-CKR-4/CD194/CKR4/CMKBR4/ChemR13/HGCN:14099/K5-5                                    |
| A07       | Hs.450802 | CCR5   | Chemokine (C-C motif) receptor 5                                                  | CC-CKR-5/CCCKR5/CCR-5/CD195/CKR-5/CKR5/CMKBR5/IDDM22                                  |
| A08       | Hs.46468  | CCR6   | Chemokine (C-C motif) receptor 6                                                  | BN-1/C-C CKR-6/CC-CKR-6/CCR-6/CD196/CKR-L3/CKRL3/CMKBR6/DCR2/DRY6/GPR29/GPRCY4/STRL22 |
| A09       | Hs.113222 | CCR8   | Chemokine (C-C motif) receptor 8                                                  | CC-CKR-8/CCR-8/CDw198/CKRL1/CMKBR8/CMKBRL2/CY6/GPRCY6/TER1                            |
| A10       | Hs.163867 | CD14   | CD14 molecule                                                                     | -                                                                                     |
| A11       | Hs.631659 | CD4    | CD4 molecule                                                                      | CD4mut                                                                                |
| A12       | Hs.472860 | CD40   | CD40 molecule, TNF receptor superfamily member 5                                  | Bp50/CDW40/TNFRSF5/p50                                                                |
| B01       | Hs.592244 | CD40LG | CD40 ligand                                                                       | CD154/CD40L/HIGM1/IGM/IMD3/T-BAM/TNFSF5/TRAP/gp39/hCD40L                              |
| B02       | Hs.838    | CD80   | CD80 molecule                                                                     | B7/B7-1/B7.1/BB1/CD28LG/CD28LG1/LAB7                                                  |
| B03       | Hs.171182 | CD86   | CD86 molecule                                                                     | B7-2/B7.2/B70/CD28LG2/LAB72                                                           |
| B04       | Hs.85258  | CD8A   | CD8a molecule                                                                     | CD8/Leu2/MAL/p32                                                                      |
| B05       | Hs.709456 | CRP    | C-reactive protein, pentraxin-related                                             | PTX1                                                                                  |
| B06       | Hs.1349   | CSF2   | Colony stimulating factor 2 (granulocyte-macrophage)                              | GMCSF                                                                                 |
| B07       | Hs.632586 | CXCL10 | Chemokine (C-X-C motif) ligand 10                                                 | C7/IFI10/INP10/IP-10/SCYB10/crg-2/gIP-10/mob-1                                        |
| B08       | Hs.198252 | CXCR3  | Chemokine (C-X-C motif) receptor 3                                                | CD182/CD183/CKR-L2/CMKAR3/GPR9/IP10-R/Mig-R/MigR                                      |
| B09       | Hs.190622 | DDX58  | DEAD (Asp-Glu-Ala-Asp) box polypeptide 58                                         | RIG-I/RIGI/RLR-1/SGMRT2                                                               |
| B10       | Hs.2007   | FASLG  | Fas ligand (TNF superfamily, member 6)                                            | ALPS1B/APT1LG1/APTL/CD178/CD95-L/CD95L/FASL/TNFSF6                                    |
| B11       | Hs.247700 | FOXP3  | Forkhead box P3                                                                   | AIID/DIETER/IPEX/JM2/PIDX/XPID                                                        |
| B12       | Hs.524134 | GATA3  | GATA binding protein 3                                                            | HDR/HDRS                                                                              |
| C01       | Hs.181244 | HLA-A  | Major histocompatibility complex, class I, A                                      | HCAA                                                                                  |
| C02       | Hs.650174 | HLA-E  | Major histocompatibility complex, class I, E                                      | EA1.2/EA2.1/HLA-6.2/MHC/QA1                                                           |

|     |           |        |                                                                                    |                                                                            |
|-----|-----------|--------|------------------------------------------------------------------------------------|----------------------------------------------------------------------------|
| C03 | Hs.643447 | ICAM1  | Intercellular adhesion molecule 1                                                  | BB2/CD54/P3.58                                                             |
| C04 | Hs.37026  | IFNA1  | Interferon, alpha 1                                                                | IFL/IFN/IFN-ALPHA/IFN-alphaD/IFNA13/IFNA@                                  |
| C05 | Hs.529400 | IFNAR1 | Interferon (alpha, beta and omega) receptor 1                                      | AVP/IFN-alpha-REC/IFNAR/IFNBR/IFRC                                         |
| C06 | Hs.93177  | IFNB1  | Interferon, beta 1, fibroblast                                                     | IFB/IFF/IFN-beta/IFNB                                                      |
| C07 | Hs.856    | IFNG   | Interferon, gamma                                                                  | IFG/IFI                                                                    |
| C08 | Hs.520414 | IFNGR1 | Interferon gamma receptor 1                                                        | CD119/IFNGR/IMD27A/IMD27B                                                  |
| C09 | Hs.193717 | IL10   | Interleukin 10                                                                     | CSIF/GVHDS/IL-10/IL10A/TGIF                                                |
| C10 | Hs.845    | IL13   | Interleukin 13                                                                     | IL-13/P600                                                                 |
| C11 | Hs.41724  | IL17A  | Interleukin 17A                                                                    | CTLA-8/CTLA8/IL-17/IL-17A/IL17                                             |
| C12 | Hs.83077  | IL18   | Interleukin 18 (interferon-gamma-inducing factor)                                  | IGIF/IL-18/IL-1g/IL1F4                                                     |
| D01 | Hs.1722   | IL1A   | Interleukin 1, alpha                                                               | IL-1A/IL1/IL1-ALPHA/IL1F1                                                  |
| D02 | Hs.126256 | IL1B   | Interleukin 1, beta                                                                | IL-1/IL1-BETA/IL1F2                                                        |
| D03 | Hs.701982 | IL1R1  | Interleukin 1 receptor, type I                                                     | CD121A/D2S1473/IL-1R-alpha/IL1R/IL1RA/P80                                  |
| D04 | Hs.89679  | IL2    | Interleukin 2                                                                      | IL-2/TCGF/lymphokine                                                       |
| D05 | Hs.98309  | IL23A  | Interleukin 23, alpha subunit p19                                                  | IL-23/IL-23A/IL23P19/P19/SGRF                                              |
| D06 | Hs.73917  | IL4    | Interleukin 4                                                                      | BCGF-1/BCGF1/BSF-1/BSF1/IL-4                                               |
| D07 | Hs.2247   | IL5    | Interleukin 5 (colony-stimulating factor, eosinophil)                              | EDF/IL-5/TRF                                                               |
| D08 | Hs.654458 | IL6    | Interleukin 6 (interferon, beta 2)                                                 | BSF2/HGF/HSF/IFNB2/IL-6                                                    |
| D09 | Hs.624    | CXCL8  | Interleukin 8                                                                      | GCP-1/GCP1/IL8/LECT/LUCT/LYNAP/MDNCF/MONAP/NAF/NAP-1/NAP1                  |
| D10 | Hs.522819 | IRAK1  | Interleukin-1 receptor-associated kinase 1                                         | IRAK/pelle                                                                 |
| D11 | Hs.289052 | IRF3   | Interferon regulatory factor 3                                                     | -                                                                          |
| D12 | Hs.166120 | IRF7   | Interferon regulatory factor 7                                                     | IMD39/IRF-7H/IRF7A/IRF7B/IRF7C/IRF7H                                       |
| E01 | Hs.172631 | ITGAM  | Integrin, alpha M (complement component 3 receptor 3 subunit)                      | CD11B/CR3A/MAC-1/MAC1A/MO1A/SLEB6                                          |
| E02 | Hs.656213 | JAK2   | Janus kinase 2                                                                     | JTK10/THCYT3                                                               |
| E03 | Hs.726603 | LY96   | Lymphocyte antigen 96                                                              | ESOP-1/MD-2/MD2/ly-96                                                      |
| E04 | Hs.524579 | LYZ    | Lysozyme                                                                           | LZM                                                                        |
| E05 | Hs.431850 | MAPK1  | Mitogen-activated protein kinase 1                                                 | ERK/ERK-2/ERK2/ERT1/MAPK2/P42MAPK/PRKM1/PRKM2/p38/p40/p41/p41mapk/p42-MAPK |
| E06 | Hs.138211 | MAPK8  | Mitogen-activated protein kinase 8                                                 | JNK/JNK-46/JNK1/JNK1A2/JNK21B1/2/PRKM8/SAPK1/SAPK1c                        |
| E07 | Hs.499674 | MBL2   | Mannose-binding lectin (protein C) 2, soluble                                      | COLEC1/HSMBPC/MBL/MBL2D/MBP/MBP-C/MBP1/MBPD                                |
| E08 | Hs.458272 | MPO    | Myeloperoxidase                                                                    | -                                                                          |
| E09 | Hs.517307 | MX1    | Myxovirus (influenza virus) resistance 1, interferon-inducible protein p78 (mouse) | IFI-78K/IFI78/MX/MxA                                                       |

|     |           |         |                                                                                     |                                                                             |
|-----|-----------|---------|-------------------------------------------------------------------------------------|-----------------------------------------------------------------------------|
| E10 | Hs.82116  | MYD88   | Myeloid differentiation primary response gene (88)                                  | MYD88D                                                                      |
| E11 | Hs.618430 | NFKB1   | Nuclear factor of kappa light polypeptide gene enhancer in B-cells 1                | EBP-1/KBF1/NF-kB1/NF-kappa-B/NF-kappaB/NFKB-p105/NFKB-p50/NFkappaB/p105/p50 |
| E12 | Hs.81328  | NFKBIA  | Nuclear factor of kappa light polypeptide gene enhancer in B-cells inhibitor, alpha | IKBA/MAD-3/NFKBI                                                            |
| F01 | Hs.159483 | NLRP3   | NLR family, pyrin domain containing 3                                               | AGTAVPRL/Ail/AVP/C1orf7/CIA51/CLR1.1/FCAS/FCAS1/FCU/MWS/NALP3/PYPAF1        |
| F02 | Hs.738731 | NOD1    | Nucleotide-binding oligomerization domain containing 1                              | CARD4/CLR7.1/NLRC1                                                          |
| F03 | Hs.592072 | NOD2    | Nucleotide-binding oligomerization domain containing 2                              | ACUG/BLAU/CARD15/CD/CLR16.3/IBD1/NLRC2/NOD2B/PSORAS1                        |
| F04 | Hs.538979 | RAG1    | Recombination activating gene 1                                                     | RAG-1/RNF74                                                                 |
| F05 | Hs.256022 | RORC    | RAR-related orphan receptor C                                                       | NR1F3/RORG/RZR-GAMMA/RZRG/TOR                                               |
| F06 | Hs.591607 | SLC11A1 | Solute carrier family 11 (proton-coupled divalent metal ion transporters), member 1 | LSH/NRAMP/NRAMP1                                                            |
| F07 | Hs.642990 | STAT1   | Signal transducer and activator of transcription 1, 91kDa                           | CANDF7/IMD31A/IMD31B/IMD31C/ISGF-3/STAT91                                   |
| F08 | Hs.463059 | STAT3   | Signal transducer and activator of transcription 3 (acute-phase response factor)    | ADMIO/APRF/HIES                                                             |
| F09 | Hs.80642  | STAT4   | Signal transducer and activator of transcription 4                                  | SLEB11                                                                      |
| F10 | Hs.524518 | STAT6   | Signal transducer and activator of transcription 6, interleukin-4 induced           | D12S1644/IL-4-STAT/STAT6B/STAT6C                                            |
| F11 | Hs.272409 | TBX21   | T-box 21                                                                            | T-PET/T-bet/TBET/TBLYM                                                      |
| F12 | Hs.29344  | TICAM1  | Toll-like receptor adaptor molecule 1                                               | IIAE6/MyD88-3/PRVTIRB/TICAM-1/TRIF                                          |
| G01 | Hs.654532 | TLR1    | Toll-like receptor 1                                                                | CD281/TIL/TIL. LPRS5/rsc786                                                 |
| G02 | Hs.519033 | TLR2    | Toll-like receptor 2                                                                | CD282/TIL4                                                                  |
| G03 | Hs.657724 | TLR3    | Toll-like receptor 3                                                                | CD283/IIAE2                                                                 |
| G04 | Hs.174312 | TLR4    | Toll-like receptor 4                                                                | ARMD10/CD284/TLR-4/TOLL                                                     |
| G05 | Hs.604542 | TLR5    | Toll-like receptor 5                                                                | MELIOS/SLE1/SLEB1/TIL3                                                      |
| G06 | Hs.575090 | TLR6    | Toll-like receptor 6                                                                | CD286                                                                       |
| G07 | Hs.659215 | TLR7    | Toll-like receptor 7                                                                | TLR7-like                                                                   |
| G08 | Hs.660543 | TLR8    | Toll-like receptor 8                                                                | CD288                                                                       |
| G09 | Hs.87968  | TLR9    | Toll-like receptor 9                                                                | CD289                                                                       |
| G10 | Hs.241570 | TNF     | Tumor necrosis factor                                                               | DIF/TNF-alpha/TNFA/TNFSF2                                                   |
| G11 | Hs.591983 | TRAF6   | TNF receptor-associated factor 6                                                    | MGC:3310/RNF85                                                              |
| G12 | Hs.75516  | TYK2    | Tyrosine kinase 2                                                                   | IMD35/JTK1                                                                  |
| H01 | Hs.520640 | ACTB    | Actin, beta                                                                         | BRWS1/PS1TP5BP1                                                             |
| H02 | Hs.534255 | B2M     | Beta-2-microglobulin                                                                | -                                                                           |

|            |                  |              |                                          |                        |
|------------|------------------|--------------|------------------------------------------|------------------------|
| <b>H03</b> | <b>Hs.592355</b> | <b>GAPDH</b> | Glyceraldehyde-3-phosphate dehydrogenase | G3PD/GAPD/HEL-S-162eP  |
| <b>H04</b> | <b>Hs.412707</b> | <b>HPRT1</b> | Hypoxanthine phosphoribosyltransferase 1 | HGPRT/HPRT             |
| <b>H05</b> | <b>Hs.546285</b> | <b>RPLP0</b> | Ribosomal protein, large, P0             | L10E/LP0/P0/PRLP0/RPP0 |
| <b>H06</b> | <b>N/A</b>       | <b>HGDC</b>  | Human Genomic DNA Contamination          | HIGX1A                 |
| <b>H07</b> | <b>N/A</b>       | <b>RTC</b>   | Reverse Transcription Control            | RTC                    |
| <b>H08</b> | <b>N/A</b>       | <b>RTC</b>   | Reverse Transcription Control            | RTC                    |
| <b>H09</b> | <b>N/A</b>       | <b>RTC</b>   | Reverse Transcription Control            | RTC                    |
| <b>H10</b> | <b>N/A</b>       | <b>PPC</b>   | Positive PCR Control                     | PPC                    |
| <b>H11</b> | <b>N/A</b>       | <b>PPC</b>   | Positive PCR Control                     | PPC                    |
| <b>H12</b> | <b>N/A</b>       | <b>PPC</b>   | Positive PCR Control                     | PPC                    |

**Figure S1**

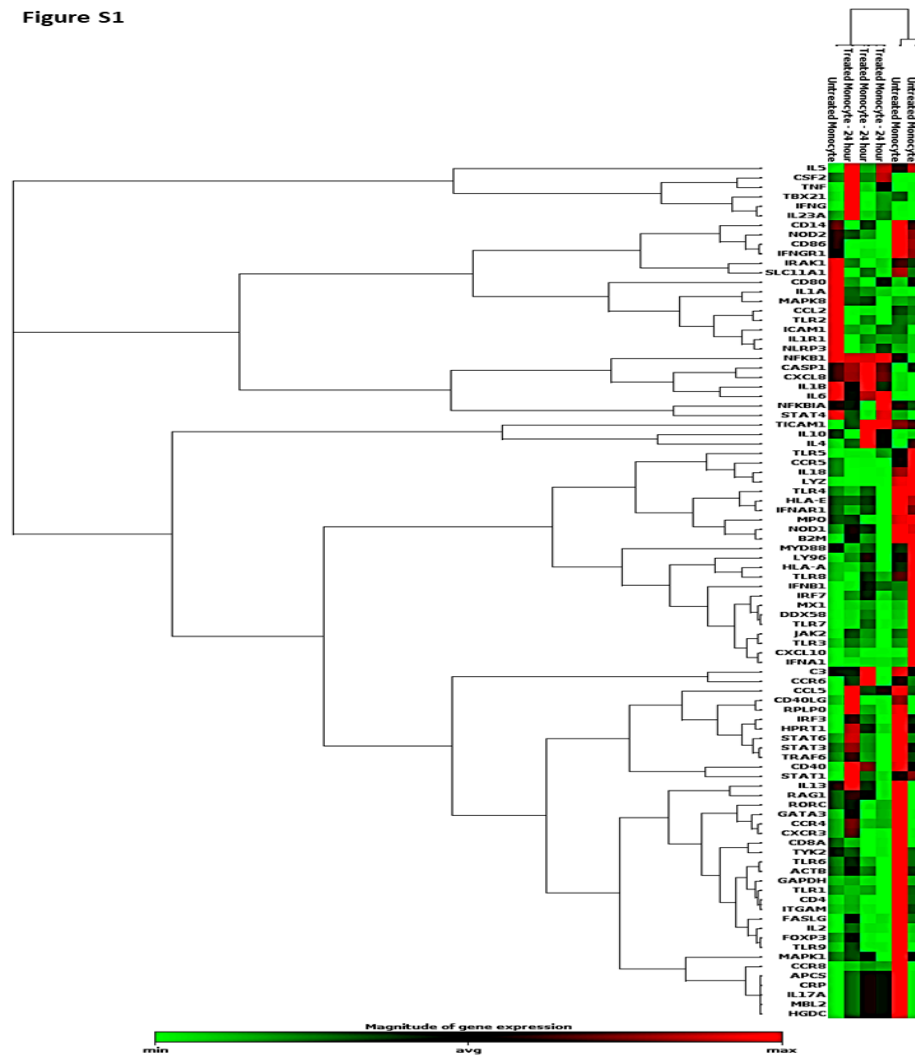

**Figure S1.** Effects of co-culturing ST285 with monocytes (n = 3) on gene/RNA expression compared to control monocytes after 24 h presented as Clustergram.

|                    | 1   | 2   | 3   | 4   | 5                   | 6   | 7                              | 8   | 9   | 10                    | 11  | 12  |
|--------------------|-----|-----|-----|-----|---------------------|-----|--------------------------------|-----|-----|-----------------------|-----|-----|
| A                  | 01  | 02  | 03  | 04  | 05                  | 06  | 07                             | 08  | 09  | 10                    | 11  | 12  |
| B                  | 13  | 14  | 15  | 16  | 17                  | 18  | 19                             | 20  | 21  | 22                    | 23  | 24  |
| C                  | 25  | 26  | 27  | 28  | 29                  | 30  | 31                             | 32  | 33  | 34                    | 35  | 36  |
| D                  | 37  | 38  | 39  | 40  | 41                  | 42  | 43                             | 44  | 45  | 46                    | 47  | 48  |
| E                  | 49  | 50  | 51  | 52  | 53                  | 54  | 55                             | 56  | 57  | 58                    | 59  | 60  |
| F                  | 61  | 62  | 63  | 64  | 65                  | 66  | 67                             | 68  | 69  | 70                    | 71  | 72  |
| G                  | 73  | 74  | 75  | 76  | 77                  | 78  | 79                             | 80  | 81  | 82                    | 83  | 84  |
| H                  | HK1 | HK2 | HK3 | HK4 | HK5                 | GDC | RTC                            | RTC | RTC | PPC                   | PPC | PPC |
| Housekeeping genes |     |     |     |     | Genomic DNA control |     | Reverse transcription controls |     |     | Positive PCR controls |     |     |

**Figure S2.** Position of the genes and the house keeping genes (HKG) included in RT2 gene profiler arrays used to determine gene/RNA expression of monocytes post co-culturing with ST285 with monocytes.
